# Supplementary material
Source: publisher figshare collection journal article supplement (https://karger.figshare.com/articles/dataset/_/13072172)

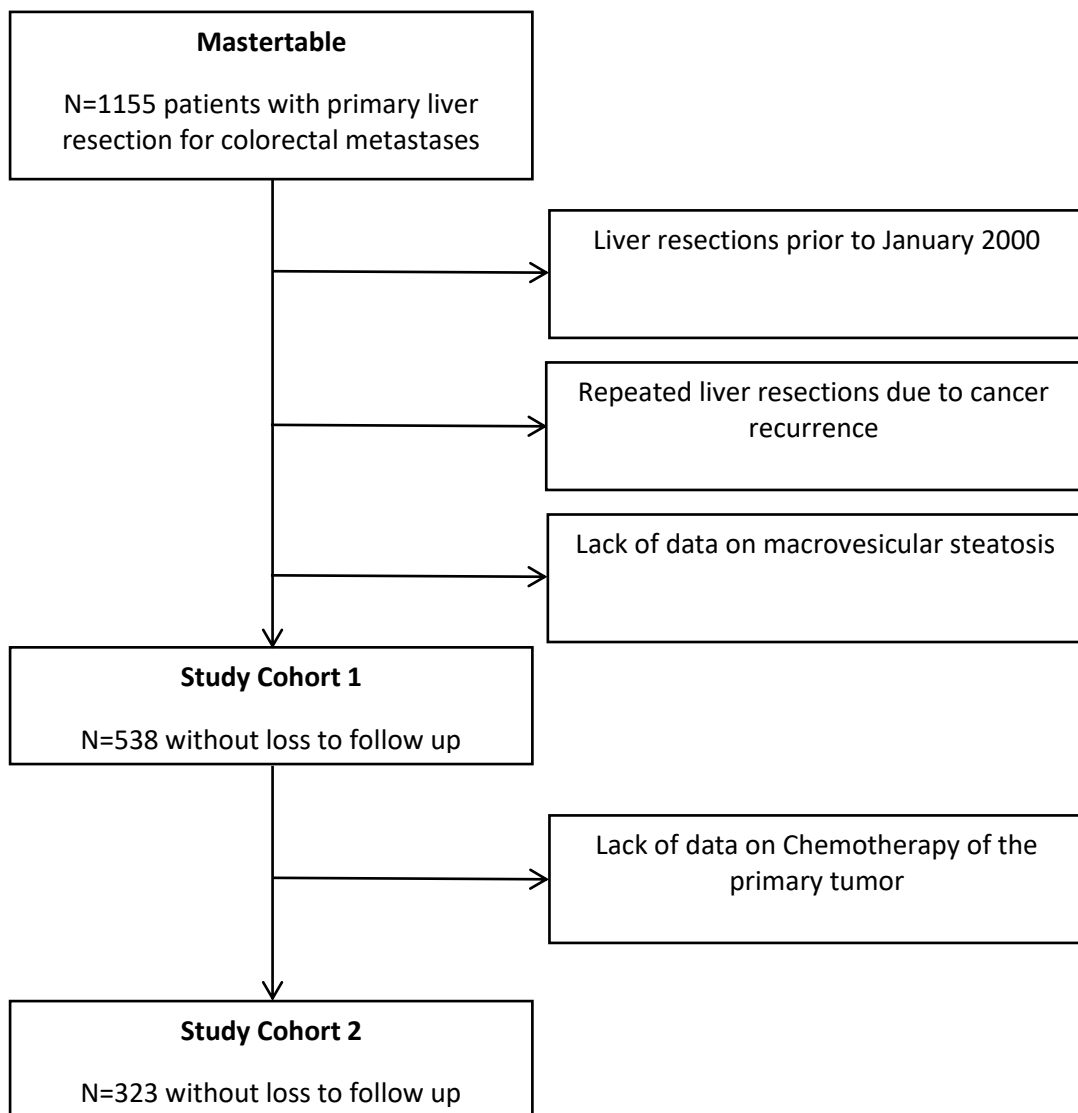

Supplementary Fig. 1: Shown is the patient selection in this study.

Supplement: Supplementary file 1 [file 1]
